# Supplementary material
Source: HighWire-hosted journal article supplement (https://bmjopen.bmj.com/content/6/10/e010461)
Supplement: inline-supplementary-material-3 [file inline-supplementary-material-3.pdf]

## **Appendix 2. Details of the Trainee Associations that undertook this study**

Association of Surgeons in Training (ASiT) (<http://www.asit.org>), is a pan-surgical specialty professional body and registered charity working to promote excellence in surgical training for the benefit of junior doctors and patients alike. Originally founded in 1976, ASiT is independent of the National Health Service (NHS), Surgical Royal Colleges, and specialty associations and has over 2700 members.

The British Orthopaedic Trainee Association (BOTA) (<http://www.bota.org.uk>) is a democratically elected representative group of doctors in all levels of Trauma and Orthopaedic surgical training in the UK. It was established in 1987 and is independent of the National Health Service (NHS), Surgical Royal Colleges and the British Orthopaedic Association. BOTA has 987 active members currently.

The Royal College of Surgeons of Edinburgh's Trainees' Committee is elected by the College membership to represent and support surgeons in training throughout the United Kingdom. It plays an essential role in the development of courses, events and resources for Trainees and, through its Chair, the elected Trainee Member of Council, raises key issues which impact surgical trainees with the College's Council.

The Psychiatric Trainees' Committee (PTC) (<http://www.rcpsych.ac.uk/traininpsychiatry/trainees/ptc.aspx>) at the Royal College of Psychiatrists represents psychiatrists in training in the UK, working with the college and other to improve psychiatric training, and advocating for our patients. It is made up of approximately 40 elected representatives from across the four nations, who represent over 3000 psychiatrists in training across the UK.

The Emergency Medicine Trainees Association (EMTA) (<http://www.rcem.ac.uk/Training-Exams/EMTA>) is an independent non-profit national body that represents over 1200 trainees in Emergency Medicine in the UK. The Association promotes excellence in emergency care and protection of adequate training in Emergency Medicine and the members of the EMTA council sit on all major committees at the Royal College of Emergency Medicine.

The British Junior Cardiologists Association (BJCA) (<http://bcs.com/bjca>) represents cardiologists in training in the UK. It can trace its origins back to 1948 but was established in its current format in 2000 and its membership includes over 1000 doctors. It is affiliated to the British Cardiovascular Society and has positive working relationships with other cardiovascular organisations and junior doctor groups in the UK and Europe. It aims to act as an advocate for cardiologists in training,

improve access to educational resources in cardiology, and promote the specialty to junior colleagues.

The Royal College of Obstetricians and Gynaecologists Trainees' Committee is a national representative body for junior doctors training in obstetrics and gynaecology. The committee has representation from every region of the UK and provides a forum for trainees to discuss and influence issues relevant to training as well as wider issues relevant to the profession.

The Society of Radiologists in Training (SRT) (<http://www.thesrt.co.uk>) was founded in 1993 under the auspices of The Royal College of Radiologists. The society is a non-profit making organisation, run by radiology trainees specifically to promote radiology training and education in the UK. The society has over 1800 registered members.
